# Supplementary material for: Prediction Power on Cardiovascular Disease of Neuroimmune Guidance Cues Expression by Peripheral Blood Monocytes Determined by Machine-Learning Methods
Source: PubMed Central journal article supplement (PMC7503551; doi:10.3390/ijms21176364), 2020-09-02
Supplement: ijms-21-06364-s001.pdf [file ijms-21-06364-s001.pdf]

# Supplementary Materials

**Supplemental table 1.** NGC expression (mean and S.D.) of in patients and healthy subjects.

| NGC     | CVD<br>Mean | CVD<br>S.D. | Healthy<br>Mean | Healthy<br>S.D. |
|---------|-------------|-------------|-----------------|-----------------|
| SEMA4D  | 11.70       | 0.23        | 11.80           | 0.16            |
| PLXNB2  | 11.51       | 0.42        | 11.51           | 0.15            |
| SEMA4A  | 11.34       | 0.49        | 11.41           | 0.21            |
| SEMA4B  | 9.77        | 0.28        | 9.97            | 0.20            |
| SEMA3E  | 9.25        | 1.09        | 9.98            | 1.11            |
| NEO1    | 8.54        | 0.17        | 8.51            | 0.08            |
| PLXNC1  | 8.32        | 0.50        | 7.81            | 0.22            |
| ADORA2B | 7.72        | 0.34        | 7.80            | 0.27            |
| EPHB6   | 7.70        | 0.27        | 7.66            | 0.14            |
| PLXND1  | 7.46        | 0.34        | 7.31            | 0.16            |
| EFNA4   | 7.24        | 0.19        | 7.09            | 0.23            |
| EFNB1   | 7.20        | 0.26        | 7.43            | 0.24            |
| EPHB2   | 7.04        | 0.34        | 6.93            | 0.26            |
| SEMA3C  | 6.85        | 0.27        | 6.92            | 0.29            |
| EPHB4   | 6.83        | 0.31        | 6.65            | 0.31            |
| SEMA6B  | 6.82        | 0.29        | 6.73            | 0.26            |
| ROBO3   | 6.73        | 0.28        | 6.83            | 0.20            |
| NRP1    | 6.56        | 0.18        | 6.50            | 0.13            |
| NTNG2   | 6.54        | 0.28        | 6.46            | 0.30            |
| DSCAM   | 6.41        | 0.19        | 6.19            | 0.16            |
| SLIT2   | 6.34        | 0.15        | 6.22            | 0.11            |
| PLXNA2  | 6.32        | 0.14        | 6.20            | 0.13            |
| PLXNA1  | 6.29        | 0.26        | 6.23            | 0.24            |
| PLXNA3  | 6.28        | 0.28        | 6.39            | 0.30            |
| EPHB3   | 6.23        | 0.17        | 6.16            | 0.16            |
| DCC     | 6.10        | 0.18        | 6.23            | 0.16            |
| NRP2    | 6.08        | 0.14        | 6.02            | 0.11            |
| EPHA2   | 6.01        | 0.12        | 6.09            | 0.12            |
| EPHB1   | 5.99        | 0.14        | 5.94            | 0.12            |
| EPHA3   | 5.98        | 0.11        | 6.04            | 0.10            |
| SEMA6D  | 5.93        | 0.11        | 6.00            | 0.10            |
| NTNG1   | 5.91        | 0.11        | 5.96            | 0.13            |
| EFNA2   | 5.88        | 0.12        | 5.95            | 0.11            |
| EFNB2   | 5.76        | 0.11        | 5.70            | 0.06            |
| EPHA5   | 5.74        | 0.13        | 5.65            | 0.11            |

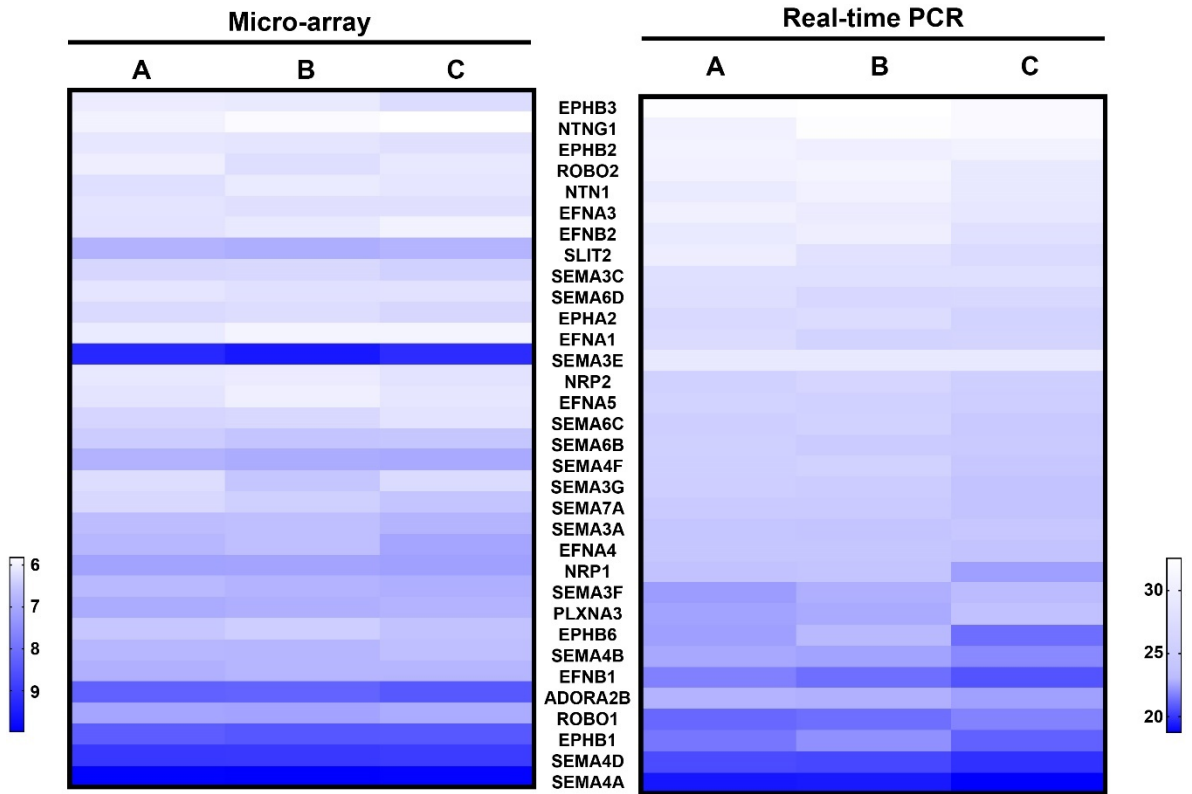

**Supplemental figure 1.** Comparison micro-array and real-time PCR. Heat-map of mRNA expression profiling of THP-1 cells for NGCs using micro-array and real-time PCR (n=3).

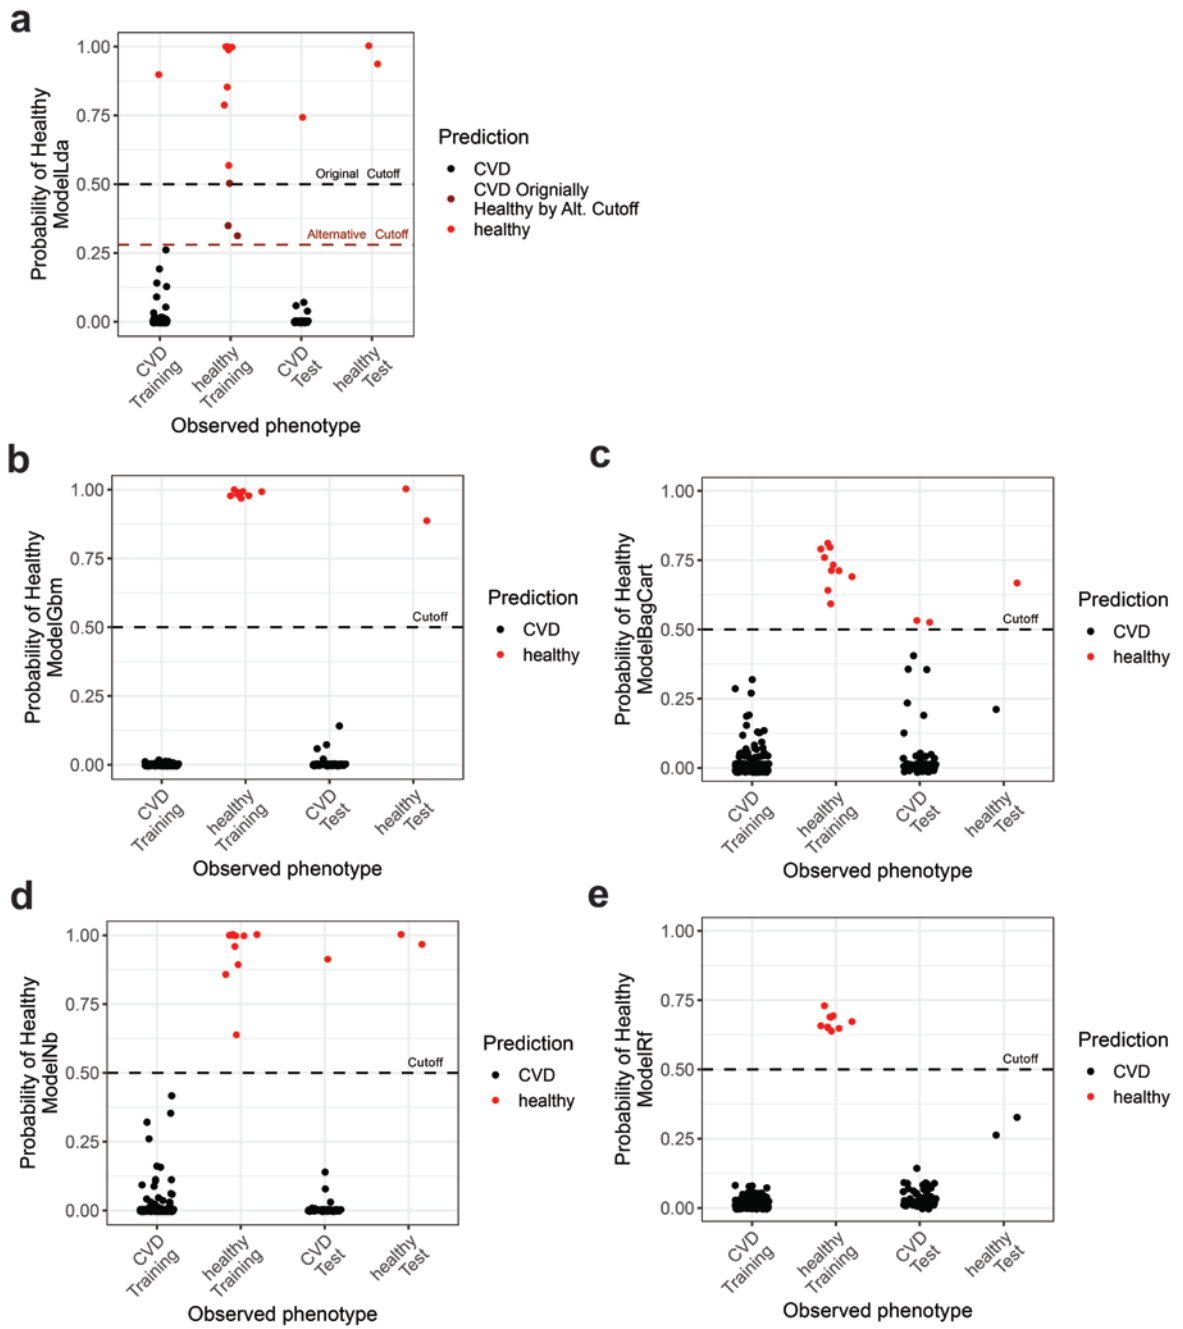

Supplemental figure 2. Probability distribution of Random Forrest and Bagged CART model.

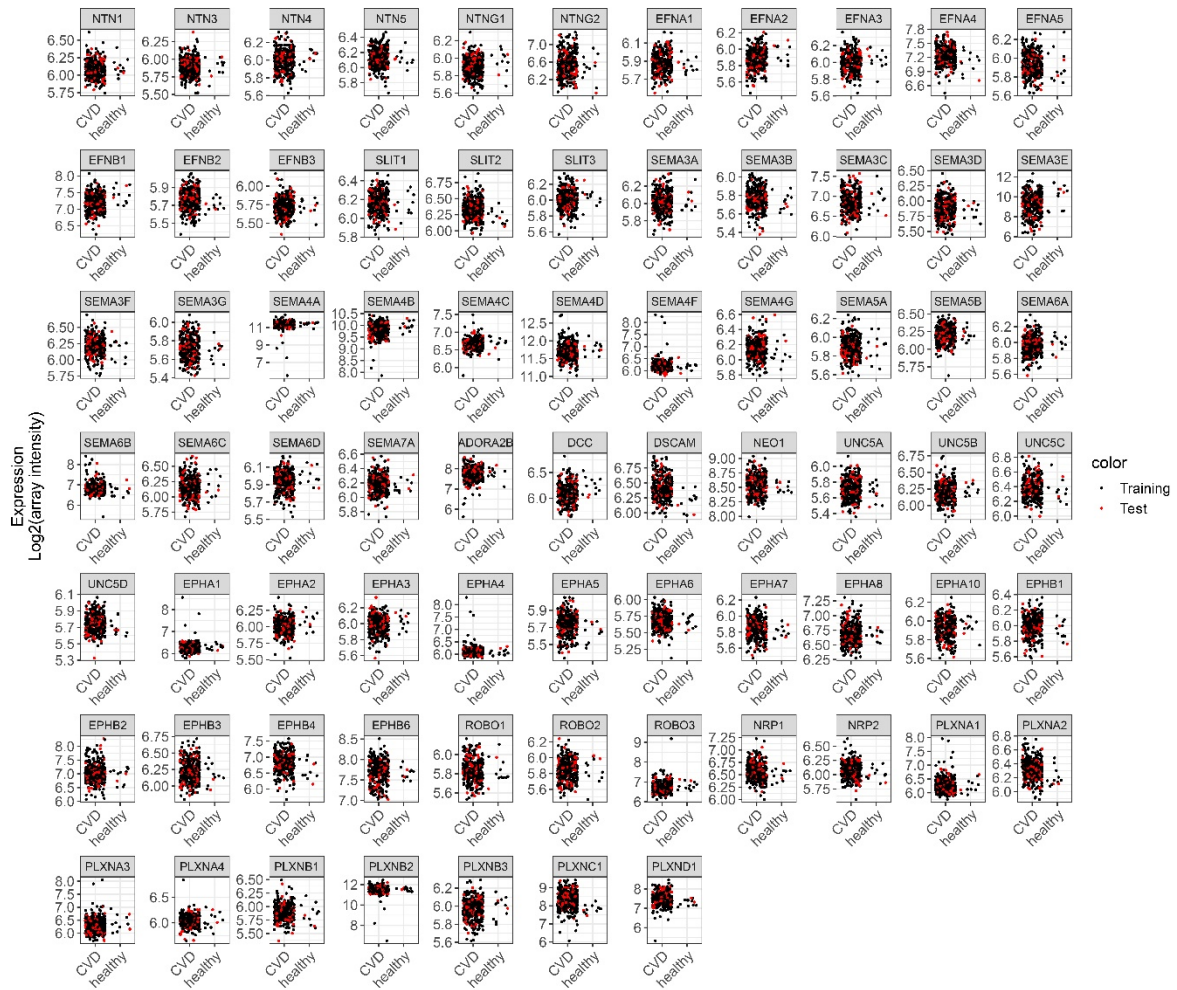

**Supplemental figure 3.** Distributions of NGC expressions in training set and test set. Jittered point plot of NGC expression in healthy subjects and patients with points in test set highlighted.
